# Supplementary material for: Controlled fabrication and optical properties of uniform CeO2 hollow spheres
Source: Royal Society of Chemistry journal article supplement (doi:10.1039/c3ra22636k), 2013-01-01
Supplement: c3ra22636k.pdf [file c3ra22636k.pdf]

---

# Controlled Fabrication and Optical Properties of Uniform CeO<sub>2</sub> Hollow Spheres

Gen Chen,<sup>a</sup> Wei Ma,<sup>a</sup> Xiaohe Liu,<sup>a,\*</sup> Shuquan Liang,<sup>b</sup> Guanzhou Qiu,<sup>a</sup> and Renzhi Ma<sup>c,\*</sup>

<sup>a</sup> Department of Inorganic Materials, School of Resources Processing and Bioengineering, Central South University, Changsha, Hunan 410083, China;

<sup>b</sup> School of Materials Science and Engineering, Central South University, Changsha, Hunan 410083, China;

<sup>c</sup> International Center for Materials Nanoarchitectonics (MANA), National Institute for Materials Science, Namiki 1-1, Tsukuba, Ibaraki 305-0044, Japan.

Correspondence to: liuxh@csu.edu.cn; Ma.renzhi@nims.go.jp

## 1. Materials and Methods

### 1.1 Synthesis of CeO<sub>2</sub> hollow spheres.

All chemicals were of analytical grade from Sinopharm Chemical Reagent Co., Ltd and used as starting materials without further purification. The spherical precursor compounds were synthesized by a biomolecule-assisted approach under hydrothermal condition. In a typical procedure, 1 mmol of Ce(NO<sub>3</sub>)<sub>3</sub>·6H<sub>2</sub>O was loaded into a 50 ml beaker with 25 ml de-ionized water, and then 2 mmol L-cysteine and 0.3 g PVP were added into the solution under continuous stirring for 5 min. Then the solution was transferred into a 50 ml Teflon-lined stainless steel autoclave and was sealed and held at a temperature of 140 °C for 8 h. Subsequently, the system was allowed to cool to room temperature naturally. The resulting precipitate was collected by filtration and washed with absolute ethanol and distilled water in sequence for several times. The final product was dried in a vacuum box at 50 °C for

4 h. As prepared Ce-organic compound spheres were calcinated to produce CeO<sub>2</sub> hollow spheres in air at 600 °C for 2 h.

## 1.2 Materials characterization

The crystal structures of obtained specimens were characterized on a X-ray diffractometer (D/max2550 VB+) with Cu K $\alpha$  radiation ( $\lambda=1.5418$  Å). The sizes and morphologies of the as-synthesized products were characterized by a field-emission scanning electron microscopy (FE-SEM, Sirion 200) with an accelerating voltage of 15 kV and transmission electron microscope (TEM, Tecnai G2 F20) with an accelerating voltage of 200 kV. The energy dispersive spectrometer (EDS) was taken on the SEM. The thermal behavior of Ce-organic compound to CeO<sub>2</sub> was evaluated by thermogravimetric (TG) and differential scanning calorimetry (DSC), which was obtained on a simultaneous thermal analysis (STA, NETZSCH STA 449C). The photoluminescence (PL) properties were measured on a fluorescence spectrometer (FluoroMax®-4 fluorescence spectrometer).

## 2. Characterization and performance

### 2.1 Supplemental electron microscopy data

Figure S1A shows the low magnification SEM image of the Ce-organic precursor compounds obtained with the time duration of 8 h, which indicates the uniform feature of these spheres. Figure S1B displays the low magnification SEM image of the as-prepared Ce-organic precursor spheres for 24 h, illustrating that the products were composed of two groups of spheres: large ones with mean diameter about 1.5  $\mu\text{m}$  and small ones with average size of about 300 nm. Figure S1C shows the close-up shot TEM image of CeO<sub>2</sub> obtained by the calcination of typical spherical Ce-organic precursor for 30 min. The hollow structure with core inside can be observed.

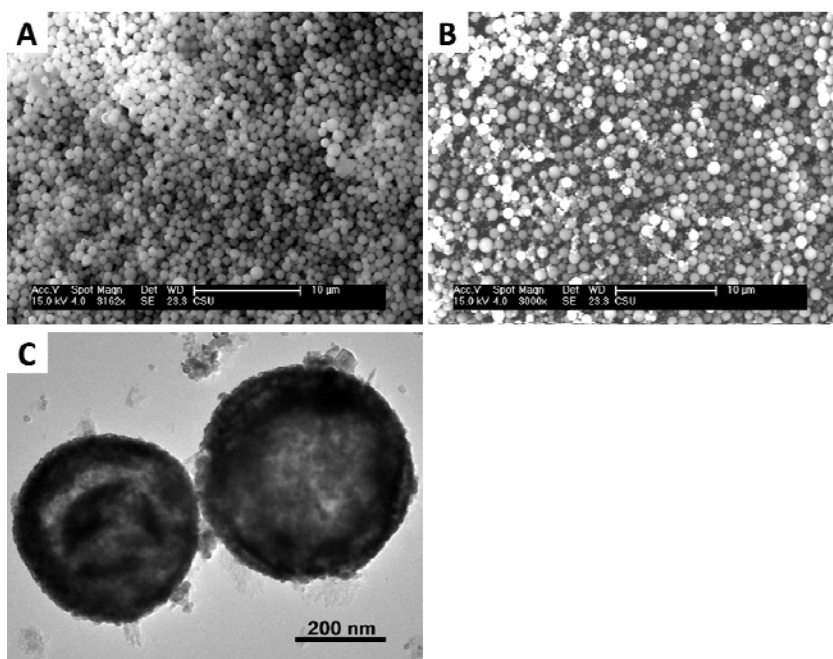

**Figure S1.** (A) and (B) Low magnification SEM views of as-prepared Ce-organic precursor spheres for 8 h and 24 h, respectively, (C) TEM close-up shot of CeO<sub>2</sub> hollow spheres with core inside.

## 2.2 Influence on the CeO<sub>2</sub> crystal phase with different amount of Sm<sup>3+</sup> doped

The addition of Sm<sup>3+</sup> with different concentrations ion into CeO<sub>2</sub> host lattice caused simultaneous effect on nanocrystal phase and size. As shown in figure S3, when 5 mol% Sm<sup>3+</sup> added into the CeO<sub>2</sub>:Sm material system, no significant change was observed comparing with XRD pattern of the pure CeO<sub>2</sub>. However, with increasing the amount of Sm<sup>3+</sup> to 10 mol%, some weak peaks of CeSO<sub>4</sub> could be seen in the degree range from 5 to 25°. The crystal phase of Sm<sub>2</sub>O<sub>2</sub>SO<sub>4</sub> occurred when 20 mol% and 50 mol% Sm<sup>3+</sup> added. It is note worth that pure Sm<sub>2</sub>O<sub>2</sub>SO<sub>4</sub> can be prepared by the two-step biomolecule-assisted route.

EDS analysis taken on the SEM was also used to demonstrate the composition change of CeO<sub>2</sub>:Sm as shown in figure S3. When 2 mol% Sm<sup>3+</sup> was doped, the morphology of final products remains unchanged (figure S3B). With 5 mol% Sm<sup>3+</sup> doped, it can be seen that the products were still composed of spheres with some broken ones (figure S3D). However, the products cannot keep the spherical structure any further when 10% mol Sm<sup>3+</sup> was doped. Many particles appeared as show in

figure S3F. The approximate element ratio was displayed in the corresponding illustration of the EDS patterns. In order to improve the conductivity of the samples, all the samples were sprayed with gold. Thus, the peak of gold was displayed in the final spectrum. The EDS and SEM analysis agrees with the XRD results, demonstrating that the  $\text{CeO}_2\text{:Sm}$  hollow spheres with pure  $\text{CeO}_2$  crystal structure could be obtained only in a certain  $\text{Sm}^{3+}$  doping range.

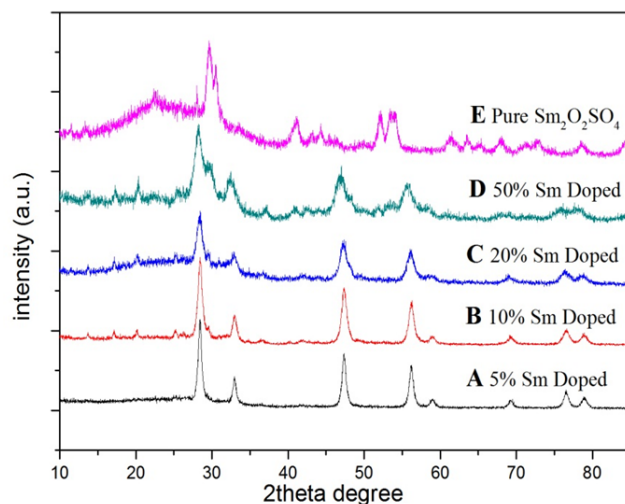

**Figure S2.** XRD patterns of  $\text{CeO}_2$  with different amount of  $\text{Sm}^{3+}$  doped.

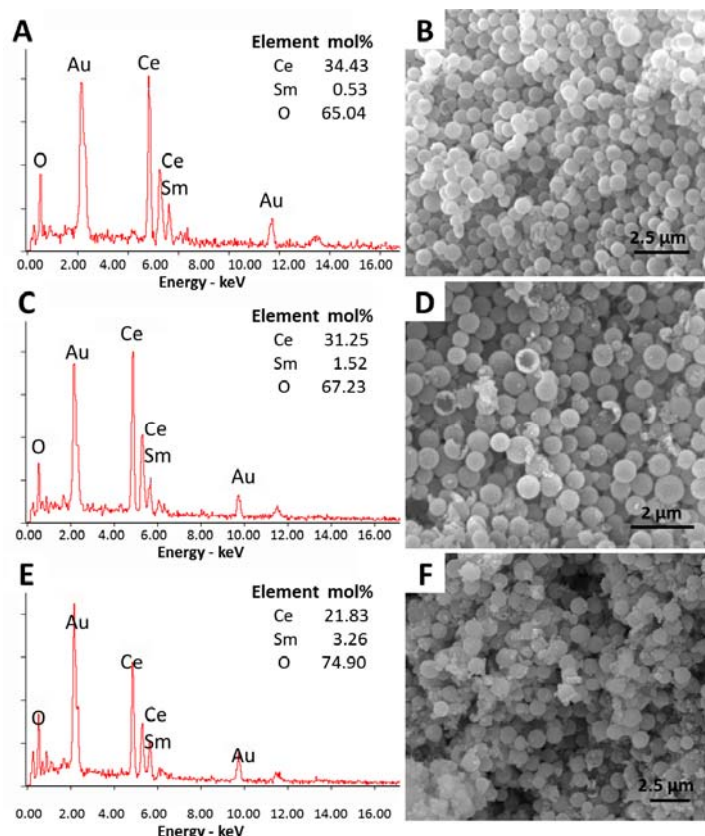

**Figure S3.** EDS patterns of  $\text{CeO}_2$  with different amount of  $\text{Sm}^{3+}$  doped: (A) 2 mol%, (C) 5 mol% and (E) 10 mol%, respectively; (B), (D) and (F) are the corresponding SEM images.

### 2.3 Crystal structure of $\text{CeO}_2$

The point-group symmetry of Ce sites in the fluorite  $\text{CeO}_2$  structure is  $O_h$  with eight-fold oxygen coordination as shown in figure S4, thereby providing an inversion symmetry. When  $\text{Sm}^{3+}$  ions are induced into  $\text{CeO}_2$  crystal structure, it has the same point-group symmetry as  $\text{Ce}^{4+}$ . Large amount of  $\text{Sm}^{3+}$  could cause inevitable distortion of lattice. The crystal structure model of  $\text{CeO}_2$  also confirms that there exists compatibility when only the small amount of  $\text{Sm}^{3+}$  doped into  $\text{CeO}_2$  crystal structure.

The energy level scheme shows that the average energy gap ( $E_g$ ) between Ce and O chemical bonds is about 10.79 eV and the average charge transfer energy ( $E_{CT}$ ) between Ce and O chemical bonds is about 3.61 eV.

When  $\text{Sm}^{3+}$  ions are induced into  $\text{CeO}_2$  crystal structure, it has the same point-group symmetry as  $\text{Ce}^{4+}$ . According to the selection rule, magnetic-dipole transitions that obey  $\Delta J=0$  and  $\pm 1$  (J: the total

angular momentum) are allowed for  $\text{Sm}^{3+}$  in a site with inversion symmetry. Therefore, the  $^4G_{5/2} \rightarrow ^6H_{5/2}$  ( $\Delta J=0$ ) and the  $^4G_{5/2} \rightarrow ^6H_{7/2}$  ( $\Delta J=1$ ) transitions can be observed. The above transitions are by magnetic dipole transition which follow the selection rule  $\Delta J=0$  and  $\Delta J=1$ , respectively.

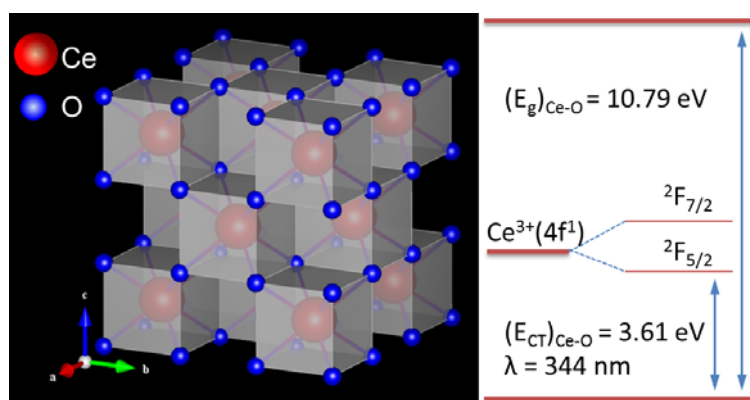

**Figure S4.** Ce-centered cube and skeleton construction with eight equatorial atoms of O in  $\text{CeO}_2$  crystal structure and energy level diagrammatic sketches of nanocrystals of  $\text{CeO}_2$ .
